# Supplementary material for: Dynamic Changes in Pre- and Postoperative Levels of Inflammatory Markers and Their Effects on the Prognosis of Patients with Gastric Cancer
Source: PubMed Central journal article supplement (PMC7904717; doi:10.1007/s11605-020-04523-8), 2020-02-03

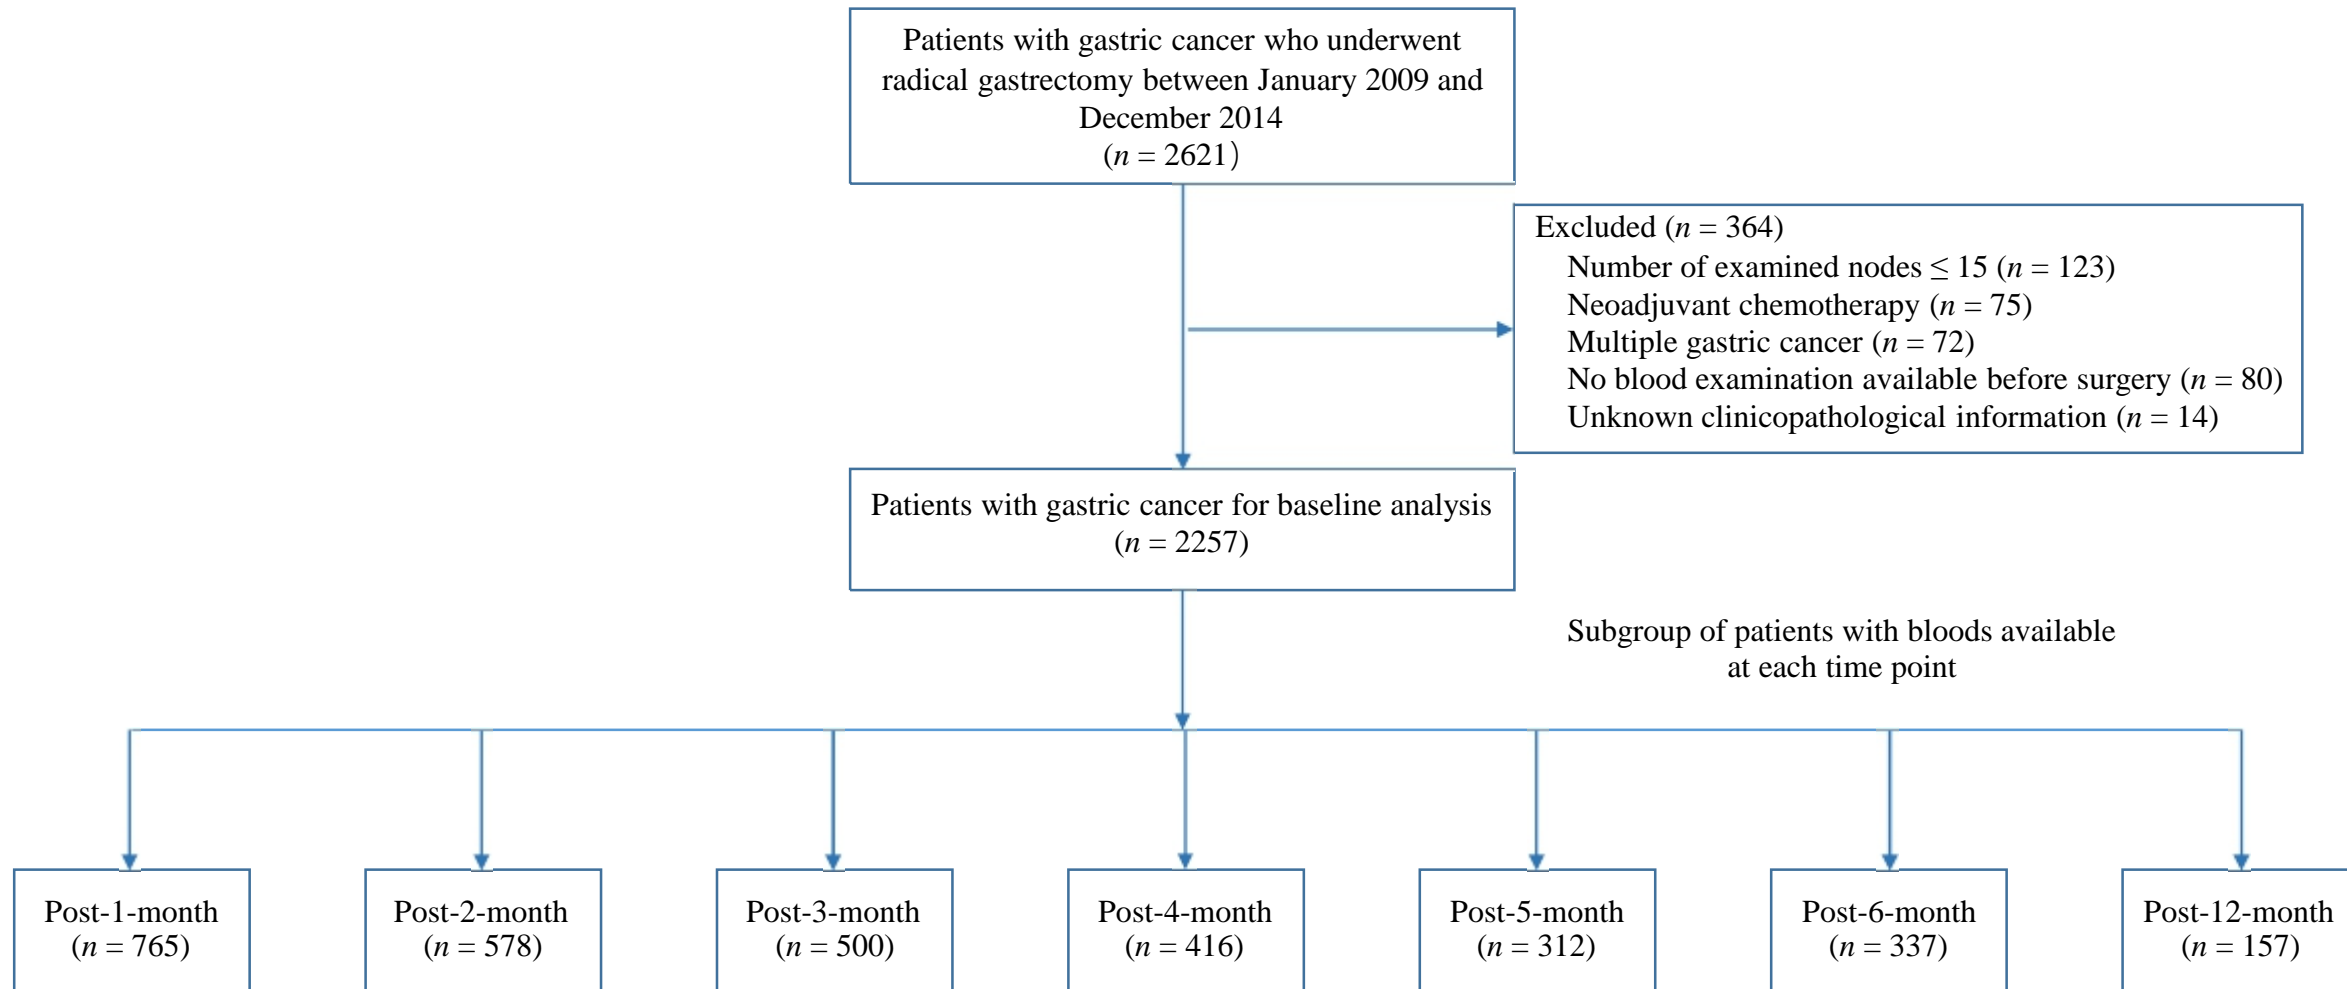

Supplement: 11605_2020_4523_MOESM1_ESM.pdf [file 11605_2020_4523_MOESM1_ESM.pdf]
